# Supplementary material for: Unintentional Injury Burden in Hong Kong: Results from a Representative Population-Based Survey
Source: MDPI journal article supplement (doi:10.3390/ijerph18168826), 2021-08-21
Supplement: s1 [file s1]

## **Supplementary Material**

Supplementary Table S1. Interaction between sleep deprivation/disturbances and alcohol consumption associated with unintentional injury by multivariable logistic regression analysis

Supplementary Table S1. Interaction between sleep deprivation/disturbances and alcohol consumption associated with unintentional injury by multivariable logistic regression analysis

|                                                                                 | Likelihood of having unintentional injury |               |         |
|---------------------------------------------------------------------------------|-------------------------------------------|---------------|---------|
|                                                                                 | Odds ratio                                | 95% CI        | P-value |
| <b>Interaction of Alcohol consumption and Sleep hour</b>                        |                                           |               |         |
| <b>(Reference: Never drinker or 6-8 hours of sleep)</b>                         |                                           |               |         |
| Former drinker $\times < 6$ hours of sleep                                      | 1.334                                     | (0.783,2.273) | 0.290   |
| Non-harmful current drinker <sup>†</sup> $\times < 6$ hours of sleep            | 1.341                                     | (0.888,2.026) | 0.163   |
| Harmful current drinker <sup>†</sup> $\times < 6$ hours of sleep                | 1.110                                     | (0.471,2.615) | 0.812   |
| Former drinker $\times \geq 9$ hours of sleep                                   | 1.177                                     | (0.647,2.140) | 0.594   |
| Non-harmful current drinker <sup>†</sup> $\times \geq 9$ hours of sleep         | 0.722                                     | (0.435,1.197) | 0.207   |
| Harmful current drinker <sup>†</sup> $\times \geq 9$ hours of sleep             | 0.555                                     | (0.171,1.800) | 0.327   |
| <b>Interaction of Alcohol consumption and Any sleep disturbance<sup>‡</sup></b> |                                           |               |         |
| <b>(Reference: Never drinker or Without sleep disturbance)</b>                  |                                           |               |         |
| Former drinker $\times$ With sleep disturbance                                  | 1.157                                     | (0.711,1.881) | 0.558   |
| Non-harmful current drinker <sup>†</sup> $\times$ With sleep disturbance        | 1.154                                     | (0.787,1.692) | 0.464   |
| Harmful current drinker <sup>†</sup> $\times$ With sleep disturbance            | 0.617                                     | (0.293,1.299) | 0.204   |

The results were adjusted by sex, age group, employment status, marital status, immigrant background, educational background, monthly household income, doctor-diagnosed chronic conditions, mental health condition, physical activity, smoking status, alcohol consumption, sleep disturbance and sleep hour.

Notes:

<sup>†</sup> Harmful drinking is defined as Alcohol Use Disorders Identification Test (AUDIT) scores  $\geq 8$ .

<sup>‡</sup> Sleep disturbance includes having difficulty in falling asleep, maintaining sleep and early morning awakenings.
